# Supplementary material
Source: Royal Society of Chemistry journal article supplement (doi:10.1039/d6tc00627b)
Supplement: d6tc00627b1.pdf [file d6tc00627b1.pdf]

## ***Electronic Supplementary Information (ESI<sup>†</sup>)***

### **A regioisomeric phenanthroquinoxaline-based small molecular defect passivation layer for enhanced efficiency in stable perovskite solar cells**

*Buddhadeb Mondal,<sup>a†</sup> Yash Taneja,<sup>b†</sup> Chitrak Ghosh,<sup>a</sup> Ranbir Singh,<sup>\*b</sup> Suman Kalyan Samanata<sup>\*a</sup>*

<sup>a</sup> Department of Chemistry, Indian Institute of Technology Kharagpur, Kharagpur 721302, India; Email: [sksamanta@chem.iitkgp.ac.in](mailto:sksamanta@chem.iitkgp.ac.in)

<sup>b</sup> School of Mechanical and Materials Engineering (SMME), Indian Institute of Technology Mandi (IIT Mandi), Kamand, Mandi, 175005, Himachal Pradesh, India; Email: [ranbir@iitmandi.ac.in](mailto:ranbir@iitmandi.ac.in)

† These authors contributed equally to this work.

## 1. Synthesis:

Syntheses of the key intermediate compounds **1**, **2**, and **3** were reported in previous literature. The detailed synthesis procedure and schematic of the passivators, **PNQP**, and **PNQO**, are given below.<sup>1-3</sup>

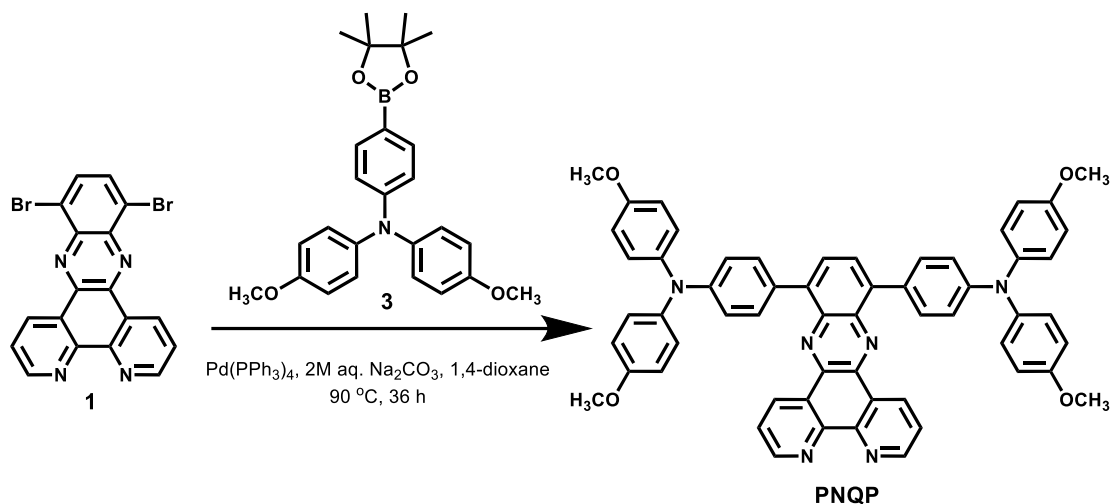

**Scheme S1.** Synthetic scheme for compound **PNQP**.

**Synthesis of PNQP:** A mixture of compound **1** (200 mg, 0.45 mmol), 4-methoxy-N-(4-(4,4,5,5-tetramethyl-1,3,2-dioxaborolan-2-yl)phenyl)aniline (444 mg, 0.99 mmol), and Pd(PPh<sub>3</sub>)<sub>4</sub> (20 mg, 0.02 mmol) was dissolved in 15 mL 1,4-dioxane under an argon atmosphere. Aqueous sodium carbonate solution (2 M, 5 mL) was added to the reaction mixture, which was stirred at 90 °C for 36 h. After being cooled to room temperature, the reaction mixture was extracted with dichloromethane and water (3 × 15 mL). The combined organic layers were washed with water and dried over anhydrous Na<sub>2</sub>SO<sub>4</sub>. After removing the solvent, the crude product was purified by column chromatography on neutral silica gel with petroleum ether/DCM (1/2, v/v) as eluent to obtain **PNQP** (302 mg, 75% yield) as a purple solid. <sup>1</sup>H NMR (400 MHz, Chloroform-d) δ 9.37 (dd, *J* = 8.1, 1.7 Hz, 2H), 9.23 (dd, *J* = 4.4, 1.7 Hz, 2H), 8.00 (s, 2H), 7.80 (d, *J* = 8.1 Hz, 4H), 7.72 (dd, *J* = 8.1, 4.4 Hz, 2H), 7.24 – 7.21 (m, 8H), 7.16 (d, *J* = 8.1 Hz, 4H), 6.95 – 6.87 (m, 8H), 3.84 (s, 12H). <sup>13</sup>C NMR (125 MHz, Chloroform-d) δ 156.27, 152.45, 148.66, 140.98, 140.74, 139.81, 138.99, 134.15, 131.84, 130.18, 128.07, 127.12, 124.33, 119.65, 114.96, 55.68.

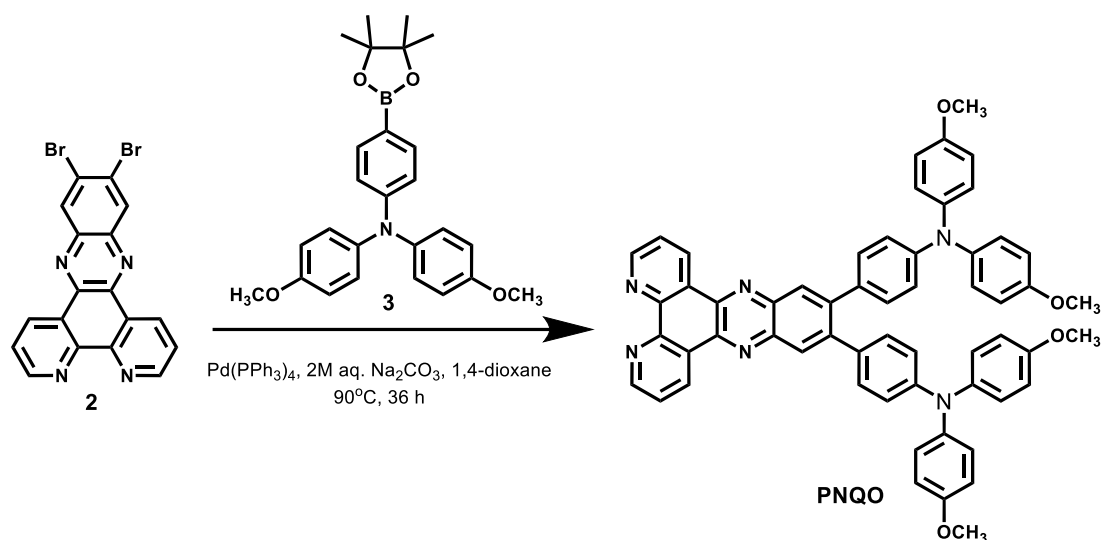

**Scheme S2.** Synthetic scheme for compound **PNQO**.

**Synthesis of PNQO:** A mixture of compound **2** (200 mg, 0.45 mmol), 4-methoxy-N-(4-(4,4,5,5-tetramethyl-1,3,2-dioxaborolan-2-yl)phenyl)aniline (444 mg, 0.99 mmol), and  $\text{Pd}(\text{PPh}_3)_4$  (20 mg, 0.02 mmol) was dissolved in 15 mL 1,4-dioxane under an argon atmosphere. Aqueous sodium carbonate solution (2 M, 5 mL) was added to the reaction mixture, which was stirred at  $90^\circ\text{C}$  for 36 h. After being cooled to room temperature, the reaction mixture was extracted with dichloromethane and water ( $3 \times 15$  mL). The combined organic layers were washed with water and dried over anhydrous  $\text{Na}_2\text{SO}_4$ . After removing the solvent, the crude product was purified by column chromatography on neutral silica gel with petroleum ether/DCM (1/3, v/v) as eluent to obtain **PNQO** (326 mg, 81% yield) as a brown solid.  $^1\text{H}$  NMR (400 MHz,  $\text{CDCl}_3$ )  $\delta$  9.59 (dd,  $J = 8.1, 1.7$  Hz, 2H), 9.25 (dd,  $J = 4.4, 1.7$  Hz, 2H), 8.29 (s, 2H), 7.76 (dd,  $J = 8.1, 4.4$  Hz, 2H), 7.14 (dt,  $J = 5.1, 2.7$  Hz, 4H), 7.12 – 7.08 (m, 8H), 6.92 – 6.84 (m, 12H), 3.81 (s, 12H).  $^{13}\text{C}$  NMR (125 MHz, Chloroform-d)  $\delta$  156.69, 152.96, 148.91, 148.76, 145.23, 142.55, 141.34, 134.28, 132.73, 131.25, 128.07, 127.43, 124.72, 120.17, 115.41, 56.15.

## 2. Characterization

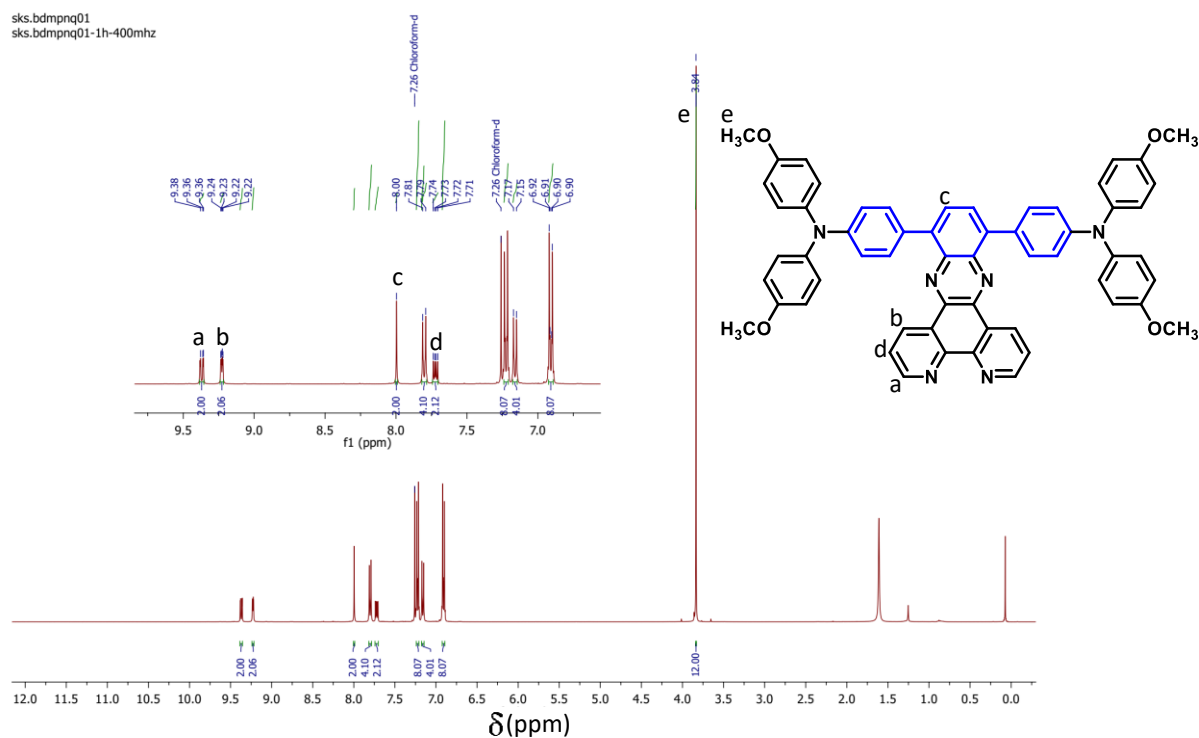

$^1\text{H}$  NMR of PNQO (400 MHz) with  $\text{CDCl}_3$  solvent at 298K

**Fig. S1.**  $^1\text{H}$  NMR spectrum of PNQP in  $\text{CDCl}_3$  at 25 °C.

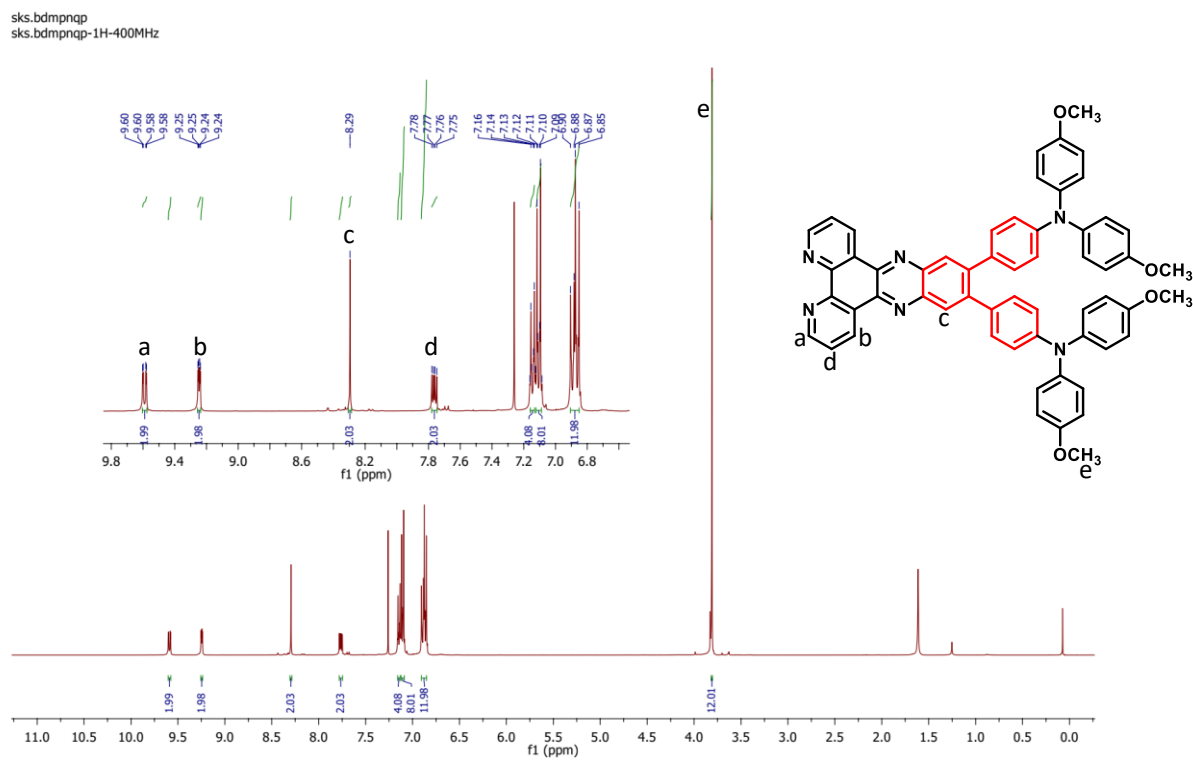

**Fig. S2.**  $^1\text{H}$  NMR spectrum of PNQO in  $\text{CDCl}_3$  at 25 °C.

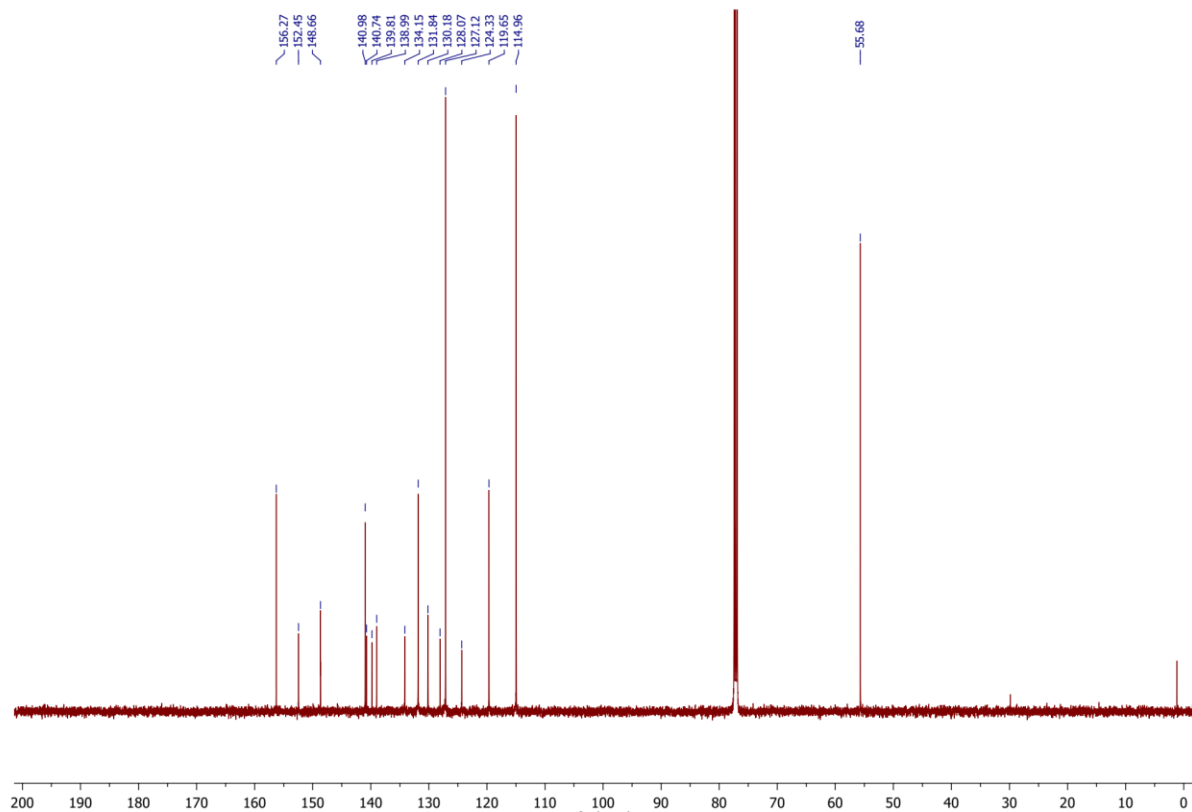

**Fig. S3.**  $^{13}\text{C}$  NMR spectrum of **PNQP** in  $\text{CDCl}_3$  at  $25\text{ }^\circ\text{C}$ .

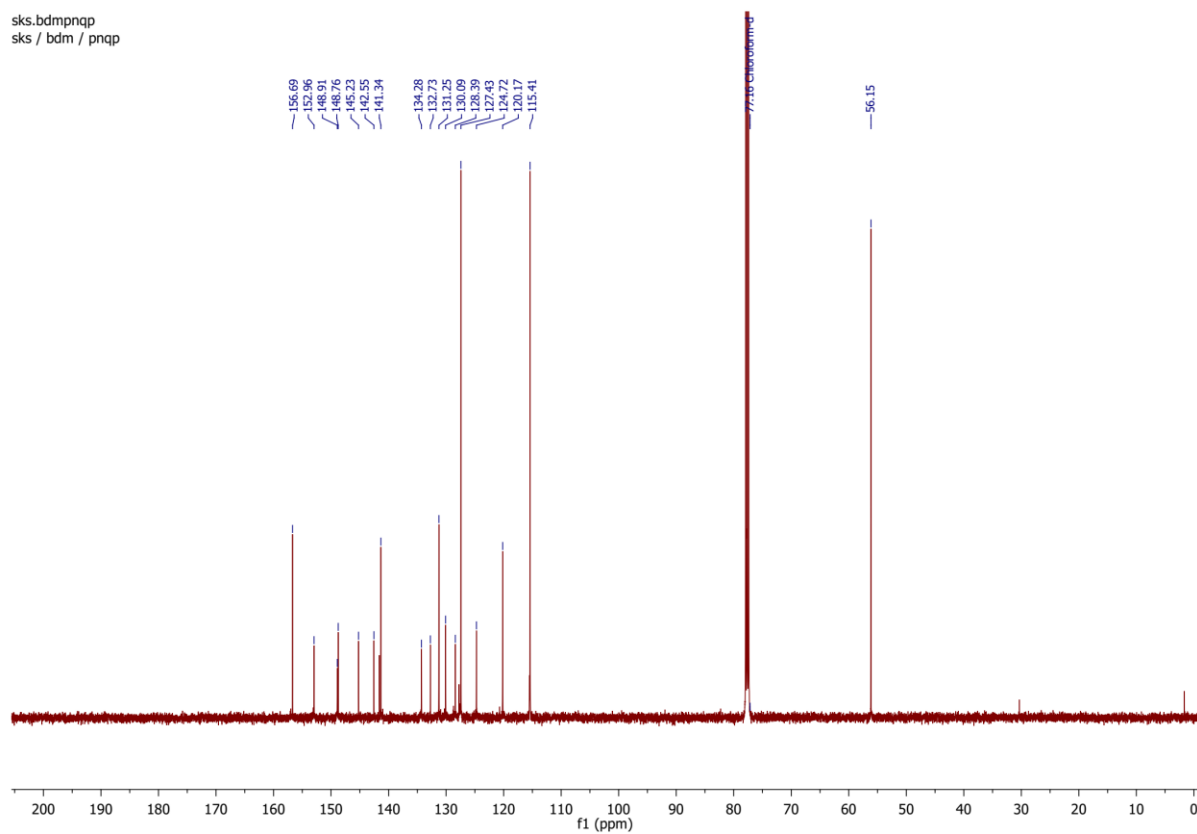

**Fig. S4.**  $^{13}\text{C}$  NMR spectrum of **PNQO** in  $\text{CDCl}_3$  at  $25\text{ }^\circ\text{C}$ .

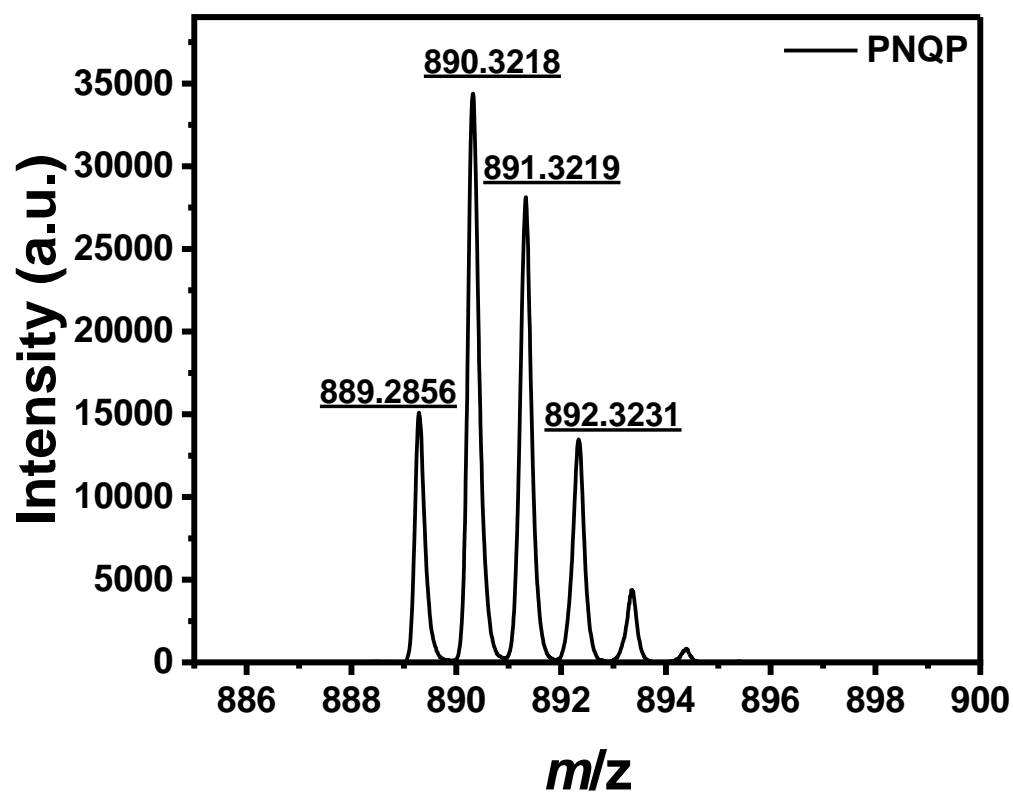

Fig. S5. MALDI-TOF of compound PNQP.

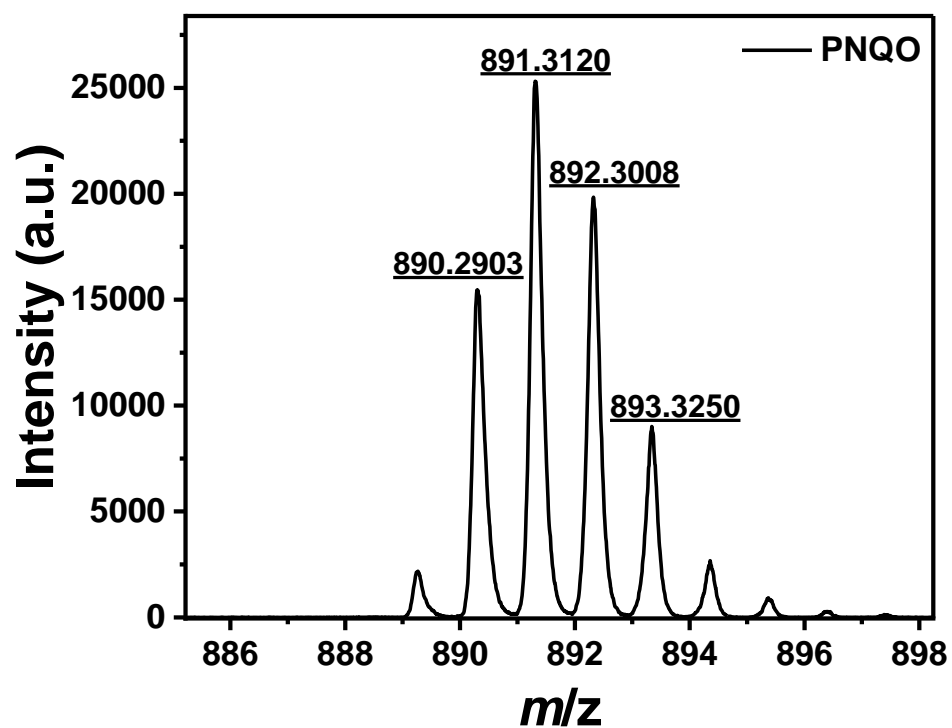

Fig. S6. MALDI-TOF of compound PNQO.

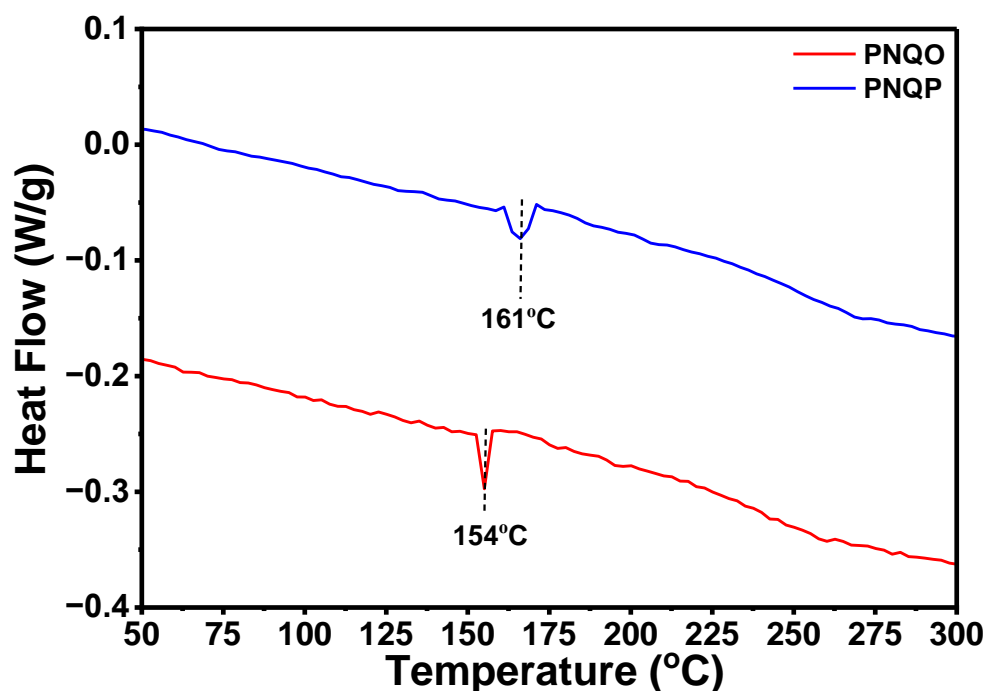

**Fig. S7.** DSC curves recorded for the **PNQP** and **PNQO** under nitrogen at a heating rate of  $10\text{ }^{\circ}\text{C min}^{-1}$  (second cycle).

### 3. Computational analysis

The geometry of all the model compounds was optimized with the Gauss view 6.0 package and GAUSSIAN 16 software using the DFT/B3LYP/631G basis set.<sup>4</sup> The TD-DFT calculations for the excited states were conducted using the CAM-B3LYP functional, comprising long-range corrections with the same basis set. For TDDFT calculations, Grimme's dispersion model D3<sup>5</sup> was employed to consider the non-covalent interaction. To ensure consistency with the experimental conditions, we considered a self-consistent reaction field (SCRF) model utilizing the SMD<sup>6</sup> approach. The experimental solvent consisted of  $\text{CHCl}_3$ . Natural bonding orbital analysis (NBO) was conducted using the built-in NBO 3.1 module within Gaussian 16. Hole reorganization energy ( $\lambda$ ) can be calculated by using the formula

$$\lambda_h = (E^+_{NG} - E^0_{NG}) + (E^0_{CG} - E^+_{CG})$$

Where  $E^0_{NG}$  and  $E^+_{CG}$  are energies of neutral and cation molecules at the ground and cationic state, respectively.  $E^0_{CG}$  and  $E^+_{NG}$  are the energies of neutral and cation molecules at cationic and ground states, respectively.

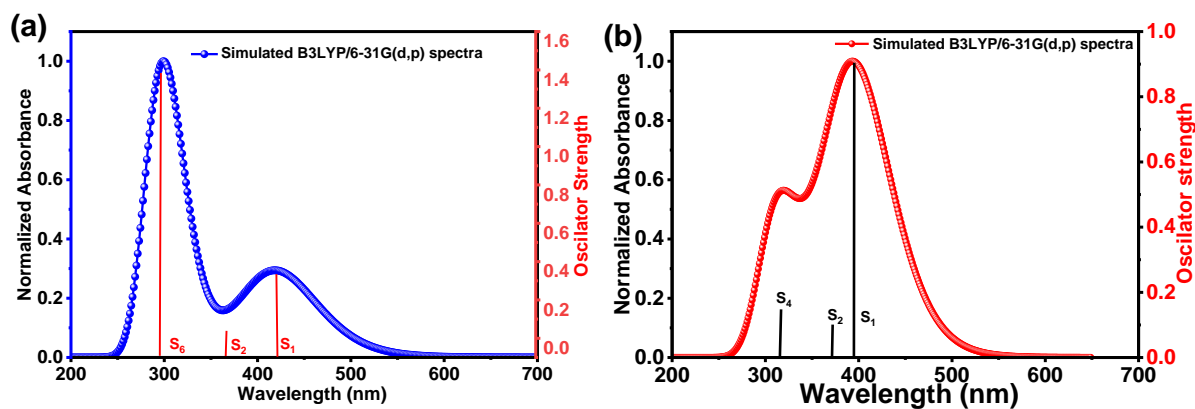

**Fig. S8.** Simulated absorption spectra of investigated passivators at the TDDFT/B3LYP/6-31G (d,p) level of theory using  $\text{CHCl}_3$  as a solvent.

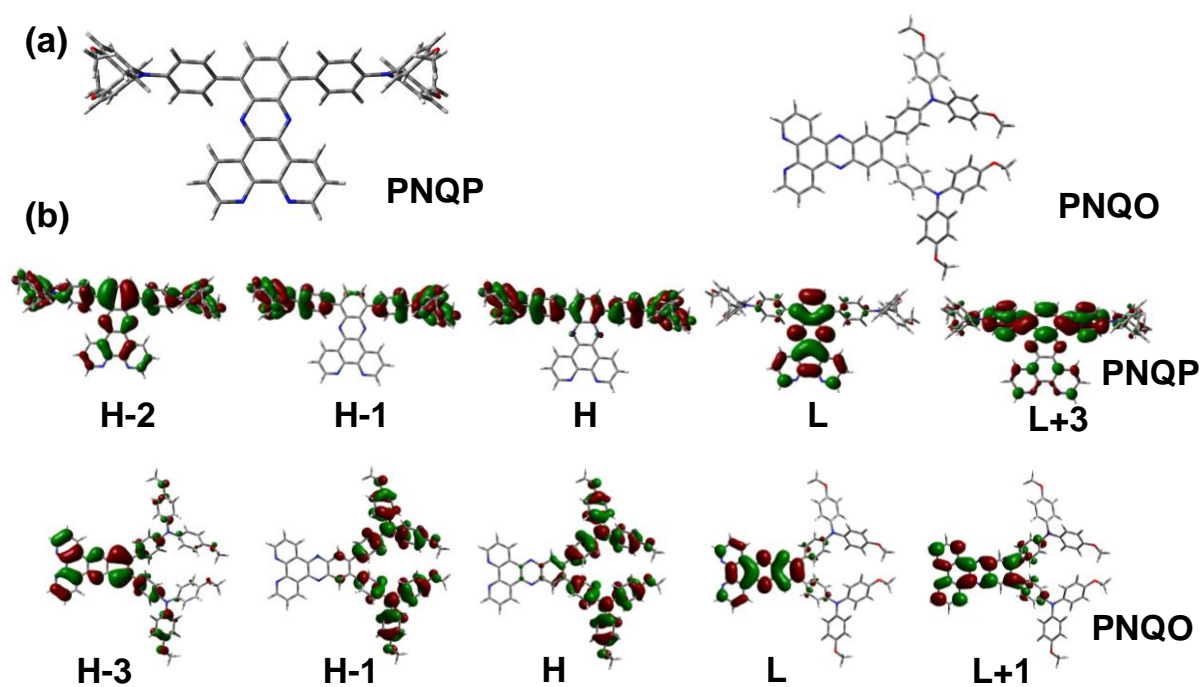

**Fig. S9.** B3LYP/6-31G(d,p) PCM minimum-energy structures (a) and frontier molecular orbitals (b) calculated for **PNQP** and **PNQO** in  $\text{CHCl}_3$ . H and L stand for HOMO and LUMO, respectively. Atom colour code: C (gray), S (yellow), N (blue), O (red) and H (white).

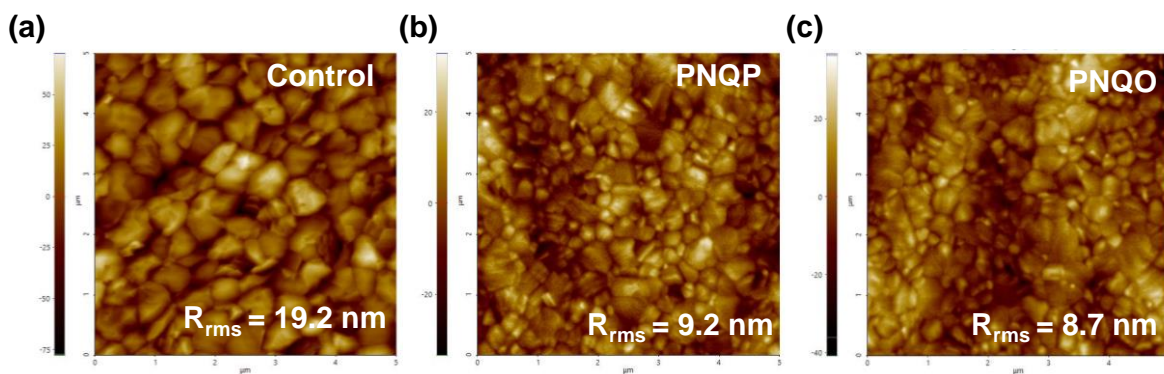

**Fig. S10.** AFM images of the control perovskite film and the perovskite films modified with PNQP and PNQO.

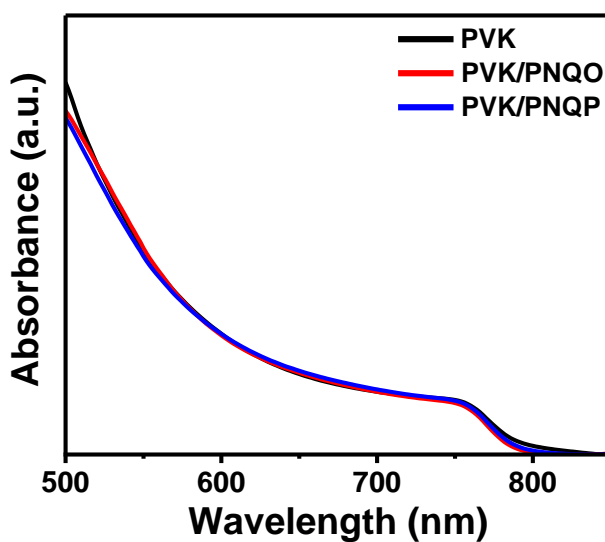

**Fig. S11.** UV-vis absorption spectra of perovskite films capped with different passivation layers.

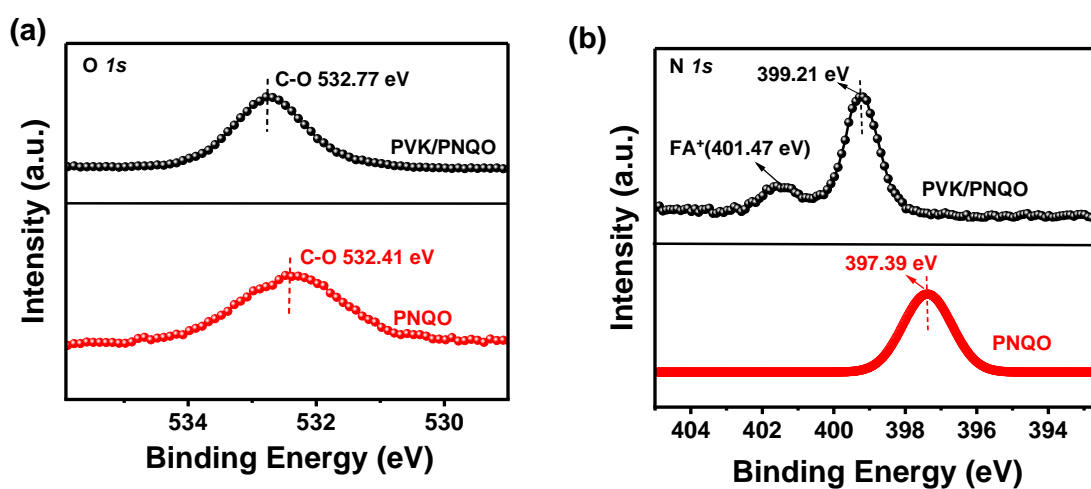

**Fig. S12.** (a) O 1s, (b) N 1s XPS spectra of pure PNQO film and PNQO/PVK film.

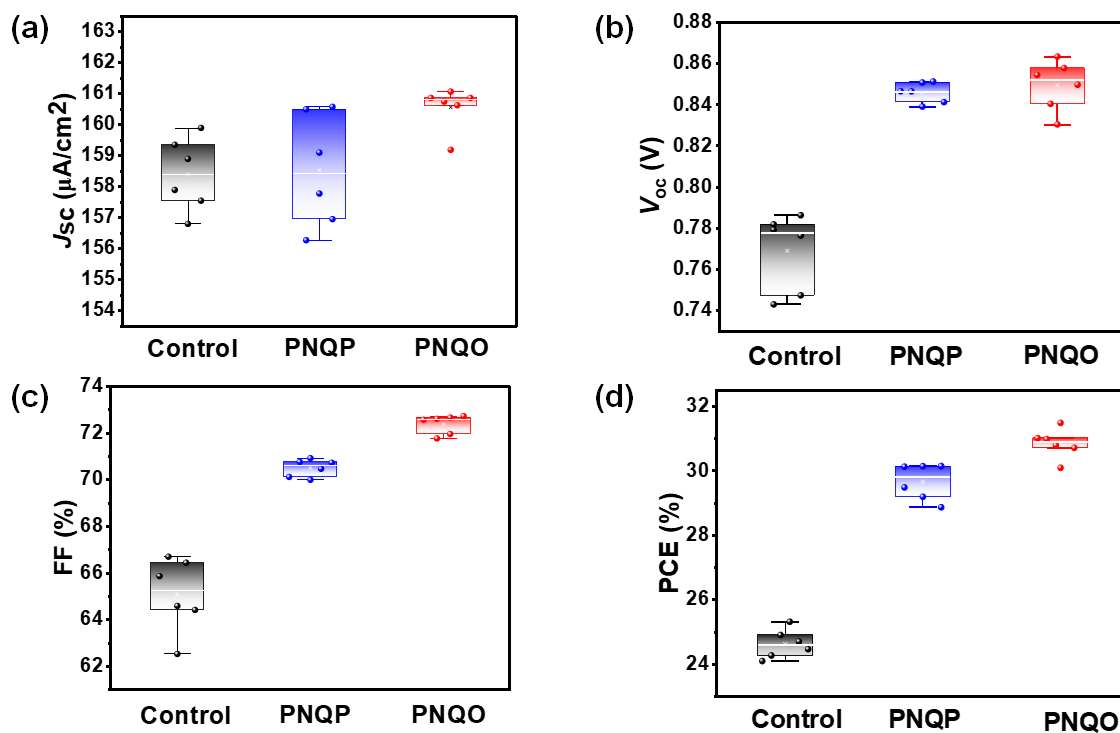

**Figure S13.** Statistics of the photovoltaic parameter distributions of independent 6 devices based on different passivation layers (indoor condition), (a) current density, (b) open circuit voltage, (c) fill factor, and (d) power conversion efficiency.

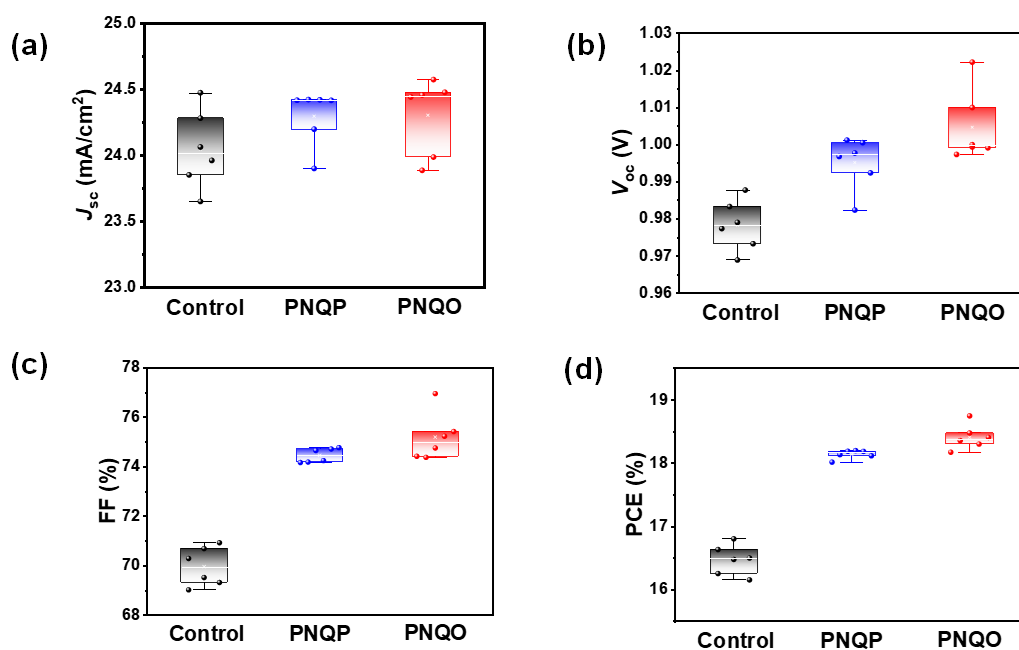

**Figure S14.** Statistics of the photovoltaic parameter distributions of independent 6 devices based on different passivation layers (outdoor condition), (a) current density, (b) open circuit voltage, (c) fill factor, and (d) power conversion efficiency.

**Table S1.** TRPL decay lifetime of the perovskite film treated with different interfacial layers.

| Compounds    | A1 (%) | A2 (%) | $\tau_1$ (ns) | $\tau_2$ (ns) | $\tau_{avg}$ (ns) |
|--------------|--------|--------|---------------|---------------|-------------------|
| PVK          | 81.27  | 18.73  | 0.75          | 45.95         | 27.12             |
| PNQP treated | 87.94  | 12.06  | 0.73          | 15.58         | 6.11              |
| PNQO treated | 90.70  | 9.30   | 0.72          | 15.98         | 3.47              |

**Table S2.** PV Performance of PNQO, PNQP treated devices under AM 1.5G (100 mW cm<sup>-2</sup>)

| Samples              | $J_{sc}$ (mA/cm <sup>2</sup> ) | $V_{oc}$ (V) | FF (%)     | PCE (%)           |
|----------------------|--------------------------------|--------------|------------|-------------------|
| Control <sup>a</sup> | 24.27                          | 0.97         | 70.69      | <b>16.64</b>      |
|                      | 24.01±0.34                     | 0.98±0.01    | 70.13±1.01 | <b>16.40±0.48</b> |
| PNQP treated         | 24.49                          | 1.01         | 74.25      | <b>18.36</b>      |
|                      | 24.20±0.30                     | 0.99±0.015   | 74.10±0.15 | <b>18.18±0.18</b> |
| PNQO treated         | 24.58                          | 1.02         | 74.76      | <b>18.74</b>      |
|                      | 24.20±0.40                     | 1.01±0.01    | 75.08±1.20 | <b>18.36±0.40</b> |

<sup>a</sup>Doped Spiro-OMeTAD as HTM without a passivation layer**Table S3.** EIS parameters of different PSCs

| Samples | $R_s$          | $R_{ct}$      |
|---------|----------------|---------------|
| Control | 18.84 $\Omega$ | 3702 $\Omega$ |
| PNQP    | 17.84 $\Omega$ | 3391 $\Omega$ |
| PNQO    | 15.67 $\Omega$ | 3264 $\Omega$ |

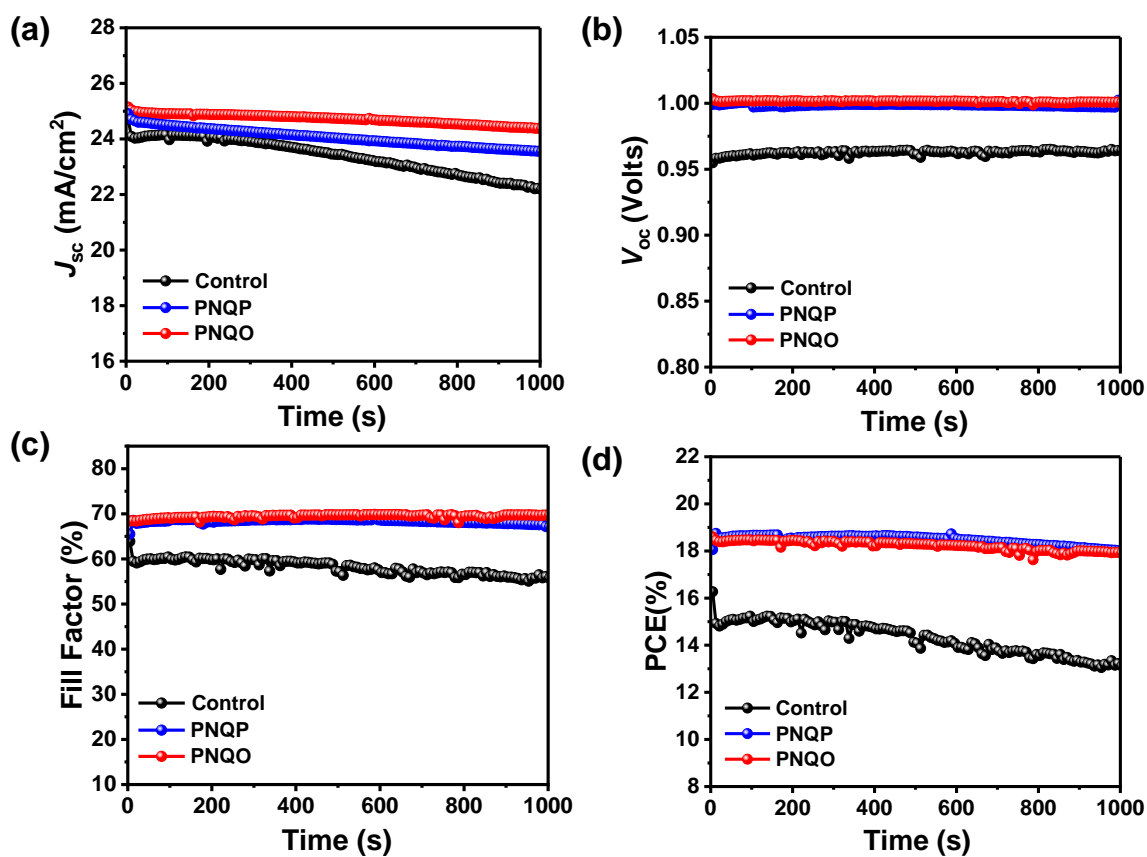

**Fig. S15.** Light soaking stability data (a)  $J_{sc}$ , (b)  $V_{oc}$ , (c) FF, (d) PCE of PSCs with and without passivators under AM 1.5 G light illumination.

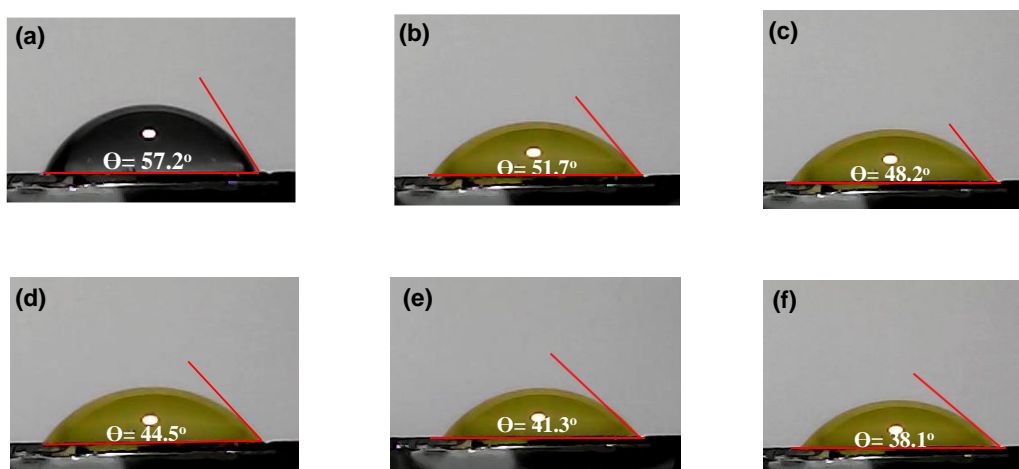

**Fig. S16.** Water contact angle of bare perovskite at (a) 0 sec, (b) 30 sec, (c) 60 sec, (d) 90 sec, (e) 180 sec, (f) 300 sec.

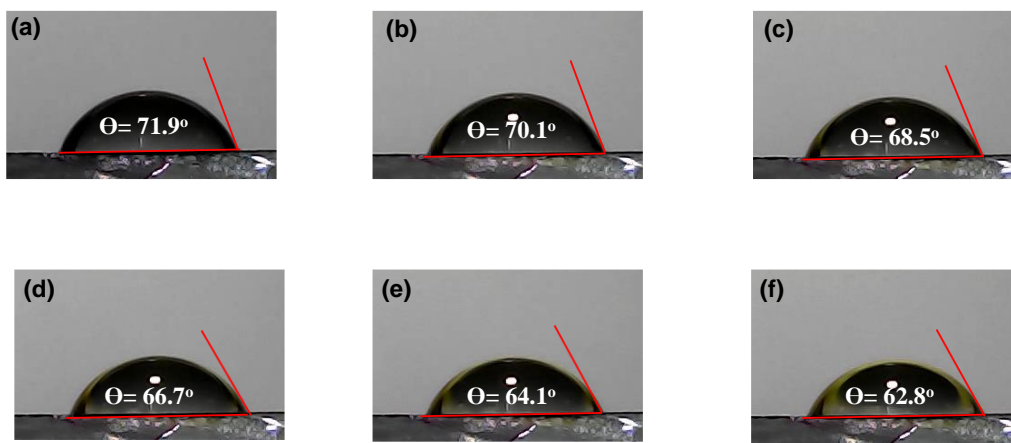

**Fig. S17.** Water contact angle of **PNQP**-treated perovskite film at (a) 0 sec, (b) 30 sec, (c) 60 sec, (d) 90 sec, (e) 180 sec, (f) 300 sec.

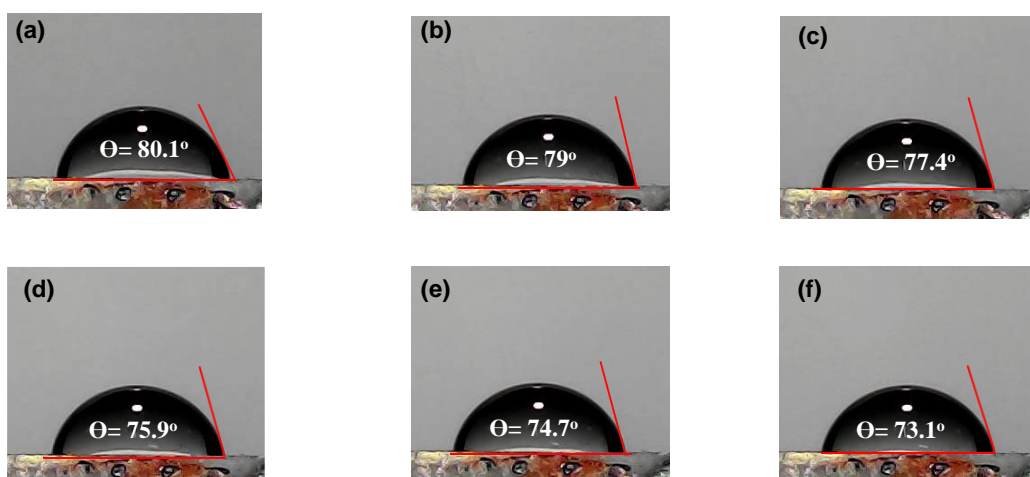

**Fig. S18.** Water contact angle of **PNQO**-treated perovskite film at (a) 0 sec, (b) 30 sec, (c) 60 sec, (d) 90 sec, (e) 180 sec, (f) 300 sec.

#### 4. References:

1. H.-L. Jia, Z.-J. Peng, S.-S. Li, C.-Y. Huang and M.-Y. Guan, *ACS Appl. Mater. Interfaces*, 2019, **11**, 15845-15852.
2. Y. Zhou, L. Bai, Y.-Y. Gu, L. Tian, H. Yin, Y.-Y. Zhang, H.-W. Zhang, D.-G. Xing and Y.-J. Liu, *Inorg. Chem. Commun.*, 2020, **118**, 108012.
3. B. X. Zhao, C. Yao, K. Gu, T. Liu, Y. Xia and Y.-L. Loo, *Energy Environ. Sci.*, 2020, **13**, 4334-4343.
4. A. D. Becke, *The Journal of Chemical Physics*, 1992, **96**, 2155-2160.
5. S. Grimme, J. Antony, S. Ehrlich and H. Krieg, *J. Chem. Phys.*, 2010, **132**, 154104.
6. A. V. Marenich, C. J. Cramer and D. G. Truhlar, *J. Phys. Chem. B*, 2009, **113**, 6378-6396.
